# Supplementary material
Source: publisher figshare collection journal article supplement (https://geolsoc.figshare.com/ndownloader/files/15278732)
Supplement: Supplementary file 1 [file 15278732]

## Sheet: Sheet1
Table S1 LA-ICP-MS U-Pb data of zircons from the Weiziping migmatites.
Spot No.	Position	Element concentration (ppm)			Th/U	Isotope ratios								Ages (Ma)								concordance
		Pb*	Th	U		207Pb/206Pb	1σ	207Pb/235U	1σ	206Pb/238U	1σ	208Pb/232Th	1σ	207Pb/206Pb	1σ	207Pb/235U	1σ	206Pb/238U	1σ	208Pb/232Th	1σ
Sample WZ01
WZ01-01		15.943	29.22	223.09	0.130979	0.05477	0.00211	0.48895	0.01415	0.06476	0.00114	0.02086	0.00064	402.7	83.23	404.2	9.65	404.5	6.92	417.3	12.7	99.9258
WZ01-02		220.996	274.53	3363.92	0.0816101	0.05834	0.00188	0.56943	0.01159	0.0708	0.0012	0.01466	0.00044	541.7	69.64	457.6	7.5	441	7.19	294.2	8.79	103.764
WZ01-03		164.618	51.82	2391.63	0.0216672	0.05462	0.00173	0.48221	0.00934	0.06403	0.00107	0.01981	0.00128	396.8	68.53	399.6	6.4	400.1	6.5	396.6	25.28	99.875
WZ01-04		60.4119	46.51	630.16	0.0738067	0.06692	0.00221	0.93913	0.02015	0.10179	0.00174	0.06277	0.00134	835.3	67.22	672.4	10.55	624.9	10.16	1230.5	25.4	107.601
WZ01-05		116.431	208.98	1584.31	0.131906	0.05586	0.00175	0.49881	0.00947	0.06477	0.00108	0.02156	0.0004	446.3	68.21	410.9	6.42	404.6	6.56	431.1	8.01	101.557
WZ01-06		16.5472	84.62	202.06	0.418786	0.05528	0.00236	0.5014	0.01716	0.06579	0.0012	0.01984	0.00045	423.4	92.51	412.7	11.61	410.7	7.25	397	8.91	100.487
WZ01-07	rim	20.5425	80.41	288.85	0.27838	0.05921	0.00358	0.58025	0.03143	0.07108	0.00153	0.03214	0.00179	575	126.41	464.6	20.19	442.6	9.19	639.5	34.97	104.971
WZ01-08		181.444	189.93	2538.69	0.0748142	0.05491	0.00169	0.49098	0.00885	0.06486	0.00108	0.02078	0.00038	408.3	66.66	405.6	6.03	405.1	6.52	415.8	7.54	100.123
WZ01-09		63.8169	18.09	547.59	0.0330357	0.07194	0.0025	1.08987	0.02615	0.10989	0.00191	0.05838	0.00244	984.1	69.14	748.4	12.7	672.1	11.09	1146.8	46.52	111.352
WZ01-10	rim	58.8431	6.96	805.11	0.00864478	0.05467	0.00183	0.48871	0.01085	0.06484	0.0011	0.02253	0.00168	398.6	72.56	404	7.4	405	6.64	450.2	33.13	99.7531
WZ01-11		20.9803	52.82	266.99	0.197835	0.05469	0.00198	0.48813	0.01265	0.06474	0.00112	0.0201	0.00045	400.1	77.58	403.6	8.63	404.4	6.76	402.2	8.92	99.8022
WZ01-12		81.8148	33.54	1248.04	0.0268741	0.05353	0.00182	0.47469	0.01091	0.06431	0.00109	0.02273	0.00098	351.4	74.91	394.4	7.51	401.8	6.6	454.4	19.36	98.1583
WZ01-13		18.4671	88.07	233.59	0.377028	0.05384	0.00206	0.47918	0.01371	0.06455	0.00113	0.0202	0.00041	364.4	83.64	397.5	9.41	403.2	6.81	404.3	8.2	98.5863
WZ01-14		172.544	19.15	2492.53	0.00768296	0.05401	0.00165	0.48397	0.00859	0.06499	0.00107	0.0265	0.00091	371.2	67.24	400.8	5.88	405.9	6.48	528.6	17.97	98.7435
WZ01-15		177.855	78.51	2567.76	0.0305753	0.05473	0.00166	0.4837	0.00845	0.0641	0.00105	0.02224	0.00047	401.3	65.91	400.6	5.78	400.5	6.39	444.6	9.35	100.025
WZ01-16		14.9457	57.59	197.18	0.292068	0.05636	0.00229	0.50566	0.01599	0.06507	0.00116	0.02058	0.00051	466	88.22	415.5	10.79	406.4	7.01	411.8	10.01	102.239
WZ01-17		15.3489	61.89	191.12	0.323828	0.05415	0.00232	0.48627	0.01668	0.06513	0.00118	0.02161	0.00057	377.3	92.87	402.4	11.39	406.7	7.12	432.1	11.27	98.9427
WZ01-18		92.9259	54.33	1324.44	0.0410211	0.05427	0.00167	0.47932	0.00868	0.06406	0.00105	0.02723	0.00057	382	67.54	397.6	5.96	400.3	6.39	543	11.18	99.3255
WZ01-19		44.6588	17.78	645.1	0.0275616	0.05437	0.00178	0.48475	0.01027	0.06466	0.00108	0.02143	0.00085	386.3	71.65	401.3	7.02	403.9	6.53	428.7	16.84	99.3563
WZ01-21	core	74.0758	159.33	206.51	0.771536	0.08578	0.00261	2.7165	0.0479	0.22966	0.00379	0.06566	0.00093	1333.3	57.85	1333	13.09	1332.7	19.89	1285.4	17.58	100.023
WZ01-22		54.9062	42.25	149.82	0.282005	0.05534	0.00232	0.50244	0.01676	0.06584	0.00118	0.02252	0.00064	425.8	90.95	413.4	11.33	411.1	7.13	450.2	12.62	100.559
WZ01-23		11.6823	28.68	548.85	0.0522547	0.0627	0.00229	0.6279	0.01664	0.07262	0.00126	0.02176	0.00086	698.1	76.07	494.8	10.38	451.9	7.55	435.1	16.96	109.493
WZ01-24		40.0617	47.42	626.83	0.0756505	0.06271	0.00244	0.65276	0.01922	0.07549	0.00133	0.02729	0.00126	698.5	80.68	510.2	11.81	469.1	8	544.1	24.8	108.761
WZ01-25		87.0585	35.6	115.91	0.307135	0.05362	0.00258	0.48206	0.01956	0.06519	0.00122	0.02387	0.00074	355.1	104.51	399.5	13.4	407.1	7.41	476.8	14.63	98.1331
WZ01-26		11.7636	28.41	283.91	0.100067	0.05269	0.00318	0.47016	0.02537	0.06471	0.00135	0.01764	0.00122	315.2	131.26	391.3	17.52	404.2	8.17	353.5	24.2	96.8085
WZ01-27		20.4718	101.59	204.06	0.497844	0.06243	0.00365	0.70707	0.03677	0.08213	0.00176	0.02723	0.00095	688.9	120.14	543	21.87	508.8	10.49	542.9	18.69	106.722
WZ01-28		25.7752	66.38	234.28	0.283336	0.05325	0.00194	0.48248	0.01273	0.0657	0.00112	0.0191	0.00041	339.4	80.35	399.8	8.72	410.2	6.76	382.3	8.14	97.4647
WZ01-29		17.5633	50.49	231.65	0.217958	0.05478	0.00231	0.48547	0.01628	0.06426	0.00115	0.02108	0.00062	403.3	91.1	401.8	11.13	401.5	6.95	421.6	12.33	100.075
WZ01-30		16.3747	50.29	620.57	0.0810384	0.05578	0.00206	0.49842	0.01342	0.06479	0.00111	0.02135	0.00055	443.5	80.04	410.6	9.09	404.7	6.71	427.1	10.98	101.458
WZ01-31		40.5135	102.63	281.19	0.364985	0.05517	0.00204	0.49493	0.01346	0.06505	0.00111	0.02056	0.00041	418.9	80.33	408.3	9.14	406.3	6.74	411.4	8.15	100.492
WZ01-32		21.9399	19.56	438.96	0.0445599	0.05489	0.00203	0.47999	0.01299	0.06341	0.00108	0.02435	0.00106	407.6	80.06	398.1	8.91	396.3	6.56	486.2	21.01	100.454
WZ01-33		30.1034	710.16	926.79	0.766258	0.05422	0.002	0.4815	0.01303	0.06439	0.0011	0.01932	0.00033	380.1	80.43	399.1	8.93	402.3	6.66	386.7	6.51	99.2046
WZ01-34		91.9067	80.74	1115.01	0.0724119	0.05424	0.00166	0.4835	0.00872	0.06464	0.00105	0.02199	0.00039	380.7	67.39	400.5	5.97	403.8	6.36	439.7	7.65	99.1828
WZ01-35		79.6516	56.62	260.89	0.217026	0.06313	0.00255	0.61818	0.01936	0.07099	0.00126	0.01985	0.00061	712.7	83.48	488.7	12.15	442.1	7.59	397.3	12.14	110.541
WZ01-36		21.3214	44.67	116.06	0.384887	0.05469	0.00426	0.48761	0.03533	0.06464	0.00157	0.01879	0.00105	400.1	165.29	403.3	24.12	403.8	9.5	376.2	20.81	99.8762
WZ01-37		10.5391	86.7	202.3	0.428571	0.06287	0.00227	0.72822	0.01816	0.08401	0.00141	0.02408	0.00046	703.9	75	555.5	10.67	520	8.37	480.8	8.99	106.827
WZ01-38		19.8991	83.64	397.51	0.21041	0.06092	0.00217	0.62364	0.01517	0.07425	0.00124	0.02368	0.00052	636.5	74.93	492.1	9.48	461.7	7.42	473.1	10.2	106.584
WZ01-39	rim	32.7841	109.16	4762.29	0.0229217	0.05594	0.00172	0.49631	0.00827	0.06435	0.00103	0.01318	0.00026	449.7	66.91	409.2	5.61	402	6.21	264.7	5.17	101.791
WZ01-40	core	318.909	88.21	311.11	0.283533	0.06606	0.00239	1.04536	0.02626	0.11479	0.00194	0.04414	0.0009	808.1	73.98	726.6	13.04	700.5	11.23	873	17.52	103.726
WZ01-41		41.5228	36.79	957.77	0.0384121	0.05516	0.00177	0.48987	0.00924	0.06442	0.00104	0.02136	0.00056	418.5	69.5	404.8	6.3	402.4	6.28	427.2	11.07	100.596
WZ01-43		70.9494	33.16	216	0.153519	0.05714	0.00226	0.52617	0.01551	0.06679	0.00114	0.02211	0.00066	496.3	85.26	429.3	10.32	416.8	6.92	442	13.06	102.999
WZ01-44		15.7089	163.68	3510.37	0.0466276	0.05543	0.00174	0.49207	0.00879	0.06439	0.00103	0.02022	0.00039	429.3	68.27	406.3	5.98	402.3	6.26	404.7	7.77	100.994
WZ01-47	rim	271.168	63.3	359.76	0.175951	0.0579	0.00201	0.53814	0.01243	0.06741	0.00111	0.01934	0.00043	525.8	74.79	437.2	8.2	420.5	6.72	387.1	8.57	103.971
WZ01-48		26.3978	101.45	173.49	0.58476	0.06066	0.00296	0.6554	0.02668	0.07836	0.00148	0.02345	0.0006	627.3	101.78	511.8	16.37	486.4	8.84	468.6	11.81	105.222
WZ01-49		16.5926	1.249	74.44	0.0167786	0.06096	0.00443	0.62453	0.04171	0.07431	0.00173	0.02576	0.00894	637.9	149.21	492.7	26.07	462.1	10.39	514	176.12	106.622
WZ01-50		5.71405	18.6	583.04	0.0319018	0.05852	0.00201	0.57694	0.01301	0.07151	0.00118	0.05952	0.00213	549.2	73.43	462.5	8.38	445.3	7.1	1168.6	40.54	103.863
WZ01-51		43.071	54.85	148.01	0.370583	0.05611	0.00202	0.53096	0.01321	0.06864	0.00115	0.01952	0.00063	456.4	77.86	432.4	8.76	427.9	6.91	390.8	12.44	101.052
WZ01-53	core	13.2411	177.74	581.29	0.305768	0.15774	0.00493	8.89777	0.15839	0.40915	0.00675	0.10817	0.00182	2431.5	52.07	2327.6	16.25	2211	30.87	2075.9	33.11	105.274
WZ01-55	rim	269.536	98.69	399.3	0.247158	0.05519	0.00186	0.49897	0.01077	0.06558	0.00107	0.02016	0.00036	419.8	73.22	411	7.3	409.4	6.5	403.5	7.15	100.391
WZ01-56		29.0613	82.78	227.51	0.363852	0.06404	0.00223	0.66847	0.01544	0.07572	0.00126	0.02633	0.00047	742.9	71.91	519.8	9.4	470.5	7.54	525.2	9.18	110.478
WZ01-57		20.1659	28.7	161.47	0.177742	0.05604	0.00278	0.50039	0.02083	0.06476	0.00121	0.02047	0.00084	453.7	106.71	412	14.09	404.5	7.33	409.6	16.69	101.854
WZ01-58		11.3949	251.97	626.82	0.401981	0.0603	0.00202	0.63021	0.0133	0.0758	0.00124	0.02462	0.00039	614.5	70.62	496.2	8.28	471	7.45	491.5	7.75	105.35
WZ01-59	rim	59.9409	57.18	335.61	0.170376	0.05862	0.00251	0.52012	0.01748	0.06436	0.00114	0.02609	0.00075	552.8	90.76	425.2	11.68	402.1	6.93	520.6	14.84	105.745
WZ01-60		23.5569	72.22	227.51	0.317437	0.05532	0.00305	0.48801	0.02341	0.06398	0.00126	0.02159	0.00073	425.1	118.78	403.6	15.98	399.8	7.65	431.7	14.41	100.95
WZ01-61		15.295	204.72	2328.49	0.0879196	0.05699	0.0018	0.53302	0.00971	0.06784	0.0011	0.0156	0.0003	490.4	68.87	433.8	6.43	423.1	6.61	313	5.91	102.529
WZ01-62		166.184	76.97	611.65	0.12584	0.05685	0.00238	0.50076	0.0163	0.06389	0.00113	0.02105	0.00078	484.9	90.62	412.2	11.03	399.3	6.82	421	15.43	103.231
WZ01-63		40.0393	111.29	227	0.490264	0.05513	0.00232	0.48078	0.01571	0.06326	0.00111	0.01905	0.00041	417.3	90.91	398.6	10.77	395.4	6.73	381.4	8.19	100.809
WZ01-65		16.9659	44.73	949.55	0.0471065	0.05671	0.00183	0.52513	0.01018	0.06716	0.00109	0.02203	0.00055	479.5	70.6	428.6	6.78	419.1	6.59	440.5	10.82	102.267
WZ01-66		66.7099	32.66	166.39	0.196286	0.05491	0.00222	0.49832	0.01535	0.06583	0.00114	0.02013	0.00058	408.4	87.62	410.6	10.4	411	6.89	402.8	11.46	99.9027
WZ01-67		11.9392	81.16	427.73	0.189746	0.06689	0.00307	0.82101	0.03071	0.08902	0.00167	0.04137	0.00171	834.4	92.96	608.6	17.13	549.8	9.91	819.4	33.12	110.695
WZ01-68		61.2625	42.02	604.18	0.0695488	0.06307	0.00204	0.71094	0.01381	0.08176	0.00133	0.02633	0.00059	710.6	67.32	545.3	8.2	506.6	7.94	525.4	11.66	107.639
WZ01-69	rim	52.2926	27.53	225.82	0.121911	0.05466	0.00303	0.48658	0.02346	0.06457	0.00127	0.02559	0.0013	398.3	119.35	402.6	16.03	403.3	7.71	510.6	25.67	99.8264
WZ01-70	core	15.7027	41.93	524.16	0.0799947	0.0684	0.00222	1.08873	0.02139	0.11545	0.00189	0.03532	0.00086	880.7	65.78	747.9	10.4	704.3	10.93	701.6	16.82	106.191
WZ01-72		57.2087	258.24	613.05	0.421238	0.06012	0.00193	0.61681	0.01167	0.07442	0.00121	0.0239	0.00035	607.8	67.8	487.8	7.33	462.7	7.26	477.4	6.83	105.425
WZ01-73	rim	41.2596	45.06	541.77	0.0831718	0.05767	0.00211	0.57297	0.01476	0.07206	0.00122	0.02572	0.00085	516.9	78.24	459.9	9.53	448.6	7.32	513.4	16.82	102.519
WZ01-74	core	52.4917	76.48	253.79	0.301352	0.07358	0.00264	1.64025	0.04074	0.16168	0.00278	0.04924	0.00126	1030.1	70.98	985.8	15.67	966.1	15.45	971.5	24.23	102.039
WZ01-75		97.203	33.97	1062.9	0.0319597	0.0639	0.00205	0.76255	0.01455	0.08655	0.00141	0.05831	0.00132	738.3	66.56	575.5	8.38	535.1	8.37	1145.5	25.13	107.55
WZ01-76	rim	18.2047	60.07	241.55	0.248686	0.0558	0.00223	0.51523	0.01555	0.06697	0.00116	0.02424	0.00058	444.3	86.44	422	10.42	417.8	7.01	484.1	11.53	101.005
WZ01-77		44.2262	370.14	476.78	0.776333	0.05818	0.0019	0.58576	0.01167	0.07303	0.00119	0.02208	0.00032	535.9	70.46	468.2	7.47	454.4	7.17	441.4	6.3	103.037
WZ01-79		41.1884	71.73	526.98	0.136115	0.0584	0.0021	0.58519	0.01448	0.07268	0.00122	0.02459	0.00061	544.7	76.62	467.8	9.28	452.3	7.35	491	12.13	103.427
WZ01-80		113.123	636.28	1394.62	0.456239	0.05748	0.00193	0.54582	0.01169	0.06888	0.00114	0.0221	0.00035	509.5	72.63	442.3	7.68	429.4	6.85	441.8	6.93	103.004
WZ01-81		13.4119	60	171.47	0.349915	0.05613	0.00218	0.5003	0.01436	0.06465	0.00111	0.0196	0.00043	457.1	83.64	411.9	9.72	403.8	6.72	392.3	8.56	102.006
WZ01-82		37.793	61.96	378.76	0.163586	0.05521	0.0023	0.48766	0.01577	0.06407	0.00113	0.0231	0.00118	420.4	90.34	403.3	10.76	400.3	6.83	461.5	23.26	100.749
WZ01-83	core	81.2252	313.23	419.05	0.747476	0.07233	0.00257	1.60146	0.0389	0.16058	0.00275	0.05002	0.00083	995.4	70.58	970.8	15.18	960	15.29	986.5	15.94	101.125
WZ01-84		78.4708	59.79	1166.61	0.0512511	0.05538	0.002	0.48889	0.01228	0.06403	0.00108	0.03198	0.00102	427.3	78.54	404.2	8.37	400.1	6.53	636.2	19.89	101.025
WZ01-85		92.0705	53.24	1212.1	0.0439238	0.05787	0.00192	0.58043	0.01198	0.07275	0.0012	0.02943	0.00079	524.4	70.7	464.7	7.7	452.7	7.19	586.3	15.52	102.651
WZ01-88		135.681	78.27	1942.67	0.0402899	0.05641	0.00182	0.52398	0.01019	0.06737	0.0011	0.02099	0.00054	467.9	70.2	427.8	6.79	420.3	6.65	419.9	10.79	101.784
WZ01-89	rim	40.4649	63.49	602.31	0.105411	0.05631	0.00199	0.50027	0.01202	0.06443	0.00108	0.02086	0.00048	464	76.66	411.9	8.13	402.5	6.54	417.3	9.56	102.335
WZ01-90	core	97.3647	389.55	638.4	0.610197	0.06936	0.00224	1.26605	0.02451	0.13239	0.00218	0.0404	0.00059	909.4	65.08	830.6	10.98	801.5	12.39	800.6	11.45	103.631
WZ01-91		158.78	25.08	2368.37	0.0105896	0.05506	0.00172	0.49629	0.00874	0.06537	0.00106	0.0226	0.00066	414.7	67.71	409.2	5.93	408.2	6.41	451.7	13.11	100.245
WZ01-93	rim	9.65797	30.21	136.2	0.221806	0.05509	0.00318	0.49233	0.025	0.06482	0.00131	0.02071	0.00092	415.6	123.5	406.5	17.01	404.9	7.91	414.3	18.23	100.395
WZ01-94	rim	44.5215	151.07	568.06	0.26594	0.06037	0.00236	0.5845	0.01696	0.07021	0.00122	0.02316	0.00055	617	82.27	467.3	10.87	437.4	7.36	462.8	10.96	106.836
WZ01-95	core	51.2141	99.66	372.57	0.267493	0.07358	0.00231	1.64845	0.02964	0.16249	0.00265	0.04839	0.0007	1029.9	62.27	989	11.36	970.6	14.71	955.2	13.59	101.896
WZ01-98		64.618	11.77	900.26	0.013074	0.0571	0.00182	0.54833	0.01031	0.06965	0.00114	0.04515	0.00134	494.7	69.45	443.9	6.76	434.1	6.86	892.5	25.9	102.258
WZ01-100	rim	8.38815	29.55	115.02	0.256912	0.05553	0.00278	0.50422	0.02126	0.06586	0.00124	0.02192	0.00076	433.3	107.25	414.6	14.35	411.1	7.51	438.2	15	100.851
WZ01-102		16.5226	111.3	216.59	0.513874	0.05466	0.002	0.48858	0.01252	0.06483	0.0011	0.01948	0.00034	398.2	79.11	403.9	8.54	404.9	6.63	390	6.8	99.753
WZ01-103		20.1596	51.86	252.46	0.205419	0.06346	0.00214	0.74543	0.0161	0.0852	0.00142	0.02472	0.00055	723.6	69.95	565.6	9.37	527.1	8.43	493.6	10.88	107.304
WZ01-104		169.871	485.42	1081.29	0.448927	0.065	0.00214	0.91867	0.01883	0.1025	0.0017	0.03963	0.00067	774.4	67.91	661.7	9.97	629	9.94	785.5	13.02	105.199
WZ01-105	rim	9.87414	61.29	131.39	0.466474	0.05497	0.00239	0.48969	0.01686	0.0646	0.00116	0.01964	0.00045	411.1	93.8	404.7	11.49	403.6	7	393.1	8.97	100.273
WZ01-106		14.3743	60.56	191.75	0.315828	0.06026	0.00247	0.60075	0.0189	0.0723	0.00128	0.02036	0.00056	612.9	86.21	477.7	11.99	450	7.7	407.4	11.14	106.156
WZ01-107		19.2451	48.36	284.17	0.17018	0.06016	0.00316	0.56774	0.0255	0.06845	0.00135	0.02641	0.00098	609.2	109.58	456.6	16.52	426.8	8.13	527	19.23	106.982
WZ01-108		42.4873	349.8	397.74	0.879469	0.05909	0.002	0.62411	0.01353	0.0766	0.00127	0.03182	0.00046	570.4	71.82	492.4	8.46	475.8	7.63	633.1	9.08	103.489
WZ01-110		66.0582	68.66	833.1	0.0824151	0.05934	0.0019	0.61859	0.01178	0.0756	0.00124	0.02506	0.00049	579.7	68.17	489	7.39	469.8	7.44	500.2	9.64	104.087
WZ01-111		33.4707	15.23	496.58	0.0306698	0.05522	0.00199	0.49886	0.01247	0.06551	0.00111	0.02505	0.00113	421.1	78.21	410.9	8.45	409.1	6.71	500.2	22.26	100.44
WZ01-112		37.0447	213.63	479.97	0.44509	0.05635	0.00201	0.52092	0.01271	0.06704	0.00113	0.01975	0.00035	465.5	77.81	425.8	8.48	418.3	6.84	395.4	6.97	101.793
WZ01-113		50.896	145.46	562.53	0.258582	0.05942	0.00202	0.61584	0.01354	0.07517	0.00126	0.02653	0.00056	582.4	72.1	487.2	8.51	467.2	7.53	529.3	11.02	104.281
WZ01-114	rim	27.6147	140.48	418.01	0.336069	0.05489	0.0032	0.48615	0.02499	0.06423	0.00131	0.01922	0.00072	407.8	124.97	402.3	17.07	401.3	7.95	384.7	14.24	100.249
WZ01-115		92.294	67.23	431.22	0.155906	0.06551	0.00205	0.81431	0.01538	0.09017	0.00151	0.05756	0.00101	790.6	64.31	604.9	8.61	556.5	8.94	1131.2	19.31	108.697
WZ01-117		127.977	483.01	1688.74	0.286018	0.05739	0.00187	0.53984	0.01074	0.06822	0.00113	0.02187	0.00035	506	70.58	438.3	7.08	425.4	6.8	437.3	6.93	103.032
WZ01-118		74.8225	341.71	908.37	0.376179	0.05861	0.00191	0.58423	0.01162	0.07229	0.00119	0.02282	0.00035	552.5	69.58	467.2	7.45	450	7.18	456	7	103.822
WZ01-121	rim	21.4715	41.58	270.75	0.153573	0.05773	0.00207	0.55289	0.01361	0.06945	0.00118	0.02091	0.00053	519.4	76.91	446.9	8.9	432.8	7.1	418.2	10.46	103.258
WZ01-122		163.797	55.44	1746.82	0.0317377	0.06424	0.002	0.80375	0.01409	0.09073	0.00148	0.03065	0.00059	749.7	64.43	598.9	7.93	559.9	8.77	610.2	11.64	106.966
WZ01-123		36.9058	360.72	432.63	0.833784	0.05685	0.00205	0.52905	0.01322	0.06748	0.00115	0.01982	0.00032	485.2	78.33	431.2	8.78	421	6.92	396.8	6.35	102.423
WZ01-124		29.4233	276.71	355.26	0.778894	0.05646	0.00194	0.51418	0.01159	0.06605	0.00111	0.01998	0.00031	469.6	74.99	421.3	7.77	412.3	6.69	399.9	6.08	102.183
WZ01-125		23.1388	76.88	316.55	0.242868	0.05615	0.00195	0.51807	0.01192	0.06691	0.00112	0.02125	0.00041	457.9	74.94	423.9	7.98	417.5	6.79	425	8.06	101.533
WZ01-126	rim	16.741	103.24	218.76	0.471933	0.05838	0.00248	0.53134	0.01766	0.066	0.00118	0.01974	0.00045	544.2	90.12	432.7	11.71	412	7.16	395.1	8.94	105.024
WZ01-127		40.4155	71.4	468.51	0.152398	0.06149	0.00226	0.67543	0.01756	0.07966	0.00137	0.03311	0.0008	656.4	77	524	10.64	494.1	8.18	658.3	15.72	106.051
WZ01-128		102.381	74.12	986.9	0.0751039	0.0648	0.00212	0.78699	0.01579	0.08807	0.00146	0.03332	0.00066	767.9	67.38	589.5	8.97	544.1	8.67	662.6	12.92	108.344
WZ01-129		152.084	138.41	2010.76	0.0688347	0.05935	0.00191	0.59153	0.01134	0.07228	0.00119	0.03115	0.0006	579.9	68.29	471.8	7.23	449.9	7.17	620.1	11.73	104.868
Sample WZ02
WZ02-01		11.9292	138.81	128.15	1.08318	0.05704	0.00231	0.50995	0.01554	0.06485	0.0011	0.02041	0.00034	492.3	87.32	418.4	10.45	405	6.64	408.3	6.66	103.309
WZ02-03		28.6848	92.16	360.11	0.255922	0.05492	0.00183	0.48879	0.01007	0.06455	0.00103	0.01998	0.00034	408.9	72.14	404.1	6.87	403.2	6.22	399.8	6.82	100.223
WZ02-04		17.1712	122.28	190.39	0.642261	0.05406	0.00203	0.49119	0.01317	0.06589	0.00109	0.02061	0.00035	373.5	82.24	405.7	8.97	411.4	6.57	412.3	7.03	98.6145
WZ02-05		6.62653	65.61	75.41	0.870044	0.05537	0.00346	0.49347	0.02756	0.06463	0.00131	0.02017	0.00054	427.1	133.75	407.3	18.74	403.7	7.96	403.6	10.66	100.892
WZ02-06		9.42801	82.4	110.38	0.746512	0.05719	0.00245	0.51005	0.01715	0.06468	0.00112	0.02017	0.00039	498.4	92.3	418.5	11.54	404	6.77	403.6	7.7	103.589
WZ02-07		8.93128	86.44	102.61	0.842413	0.0562	0.00274	0.5012	0.02031	0.06467	0.00118	0.01978	0.00043	459.7	105.21	412.5	13.74	404	7.15	395.9	8.44	102.104
WZ02-08		7.00837	58.55	83.14	0.704234	0.05481	0.00345	0.48994	0.02765	0.06484	0.00135	0.019	0.00058	404.5	134.43	404.9	18.84	405	8.15	380.5	11.55	99.9753
WZ02-10		27.1828	95.39	332.06	0.287267	0.05516	0.00184	0.49823	0.01035	0.0655	0.00105	0.02063	0.00035	418.6	72.23	410.5	7.01	409	6.35	412.6	6.87	100.367
WZ02-11		12.2865	114.09	140.46	0.81226	0.05537	0.00231	0.49952	0.01612	0.06542	0.00113	0.02016	0.00037	427	90.46	411.4	10.92	408.5	6.81	403.5	7.33	100.71
WZ02-12		11.4813	113.07	123.55	0.915176	0.05501	0.00507	0.50385	0.04378	0.06644	0.00179	0.01947	0.00077	412.5	193.87	414.3	29.56	414.6	10.79	389.7	15.25	99.9276
WZ02-13		6.59976	50.06	78.19	0.640235	0.05694	0.00282	0.5181	0.0216	0.06598	0.00122	0.02009	0.00049	488.5	106.15	423.9	14.45	411.9	7.37	402	9.63	102.913
WZ02-14		24.1144	222.26	277.52	0.800879	0.05561	0.00199	0.50005	0.01229	0.06521	0.00107	0.02007	0.00031	436.4	77.78	411.7	8.32	407.2	6.49	401.6	6.15	101.105
WZ02-15		9.39118	86.66	106.78	0.811575	0.05417	0.00249	0.4912	0.0184	0.06575	0.00117	0.0197	0.00039	378	99.5	405.7	12.53	410.5	7.05	394.3	7.81	98.8307
WZ02-16		98.1009	476.4	1264.09	0.376872	0.05532	0.00177	0.49549	0.00942	0.06495	0.00104	0.02044	0.0003	425.1	69.4	408.6	6.4	405.7	6.29	408.9	5.97	100.715
WZ02-18		6.60402	46.23	74.37	0.621622	0.05509	0.00336	0.49808	0.02708	0.06557	0.00135	0.02085	0.00063	415.7	130.87	410.4	18.35	409.4	8.16	417.1	12.55	100.244
WZ02-19		8.47958	48.58	94.72	0.51288	0.05559	0.00213	0.50448	0.01414	0.0658	0.00111	0.02045	0.00039	435.7	83.09	414.7	9.54	410.8	6.7	409.2	7.7	100.949
WZ02-21		28.6146	156.4	353.84	0.442008	0.05467	0.00191	0.48897	0.01151	0.06485	0.00107	0.02009	0.00034	398.7	75.83	404.2	7.85	405.1	6.45	402.1	6.68	99.7778
WZ02-22		230.921	61.94	3543.77	0.0174786	0.05681	0.00221	0.50506	0.01459	0.06446	0.0011	0.02797	0.00217	483.6	84.4	415.1	9.84	402.7	6.66	557.6	42.71	103.079
WZ02-23		8.87734	80.13	96.54	0.830019	0.0548	0.00237	0.48623	0.01674	0.06433	0.00113	0.01931	0.00035	404.1	93.64	402.3	11.43	401.9	6.85	386.5	7.02	100.1
WZ02-24		7.06621	58.52	83.65	0.699582	0.05682	0.00264	0.51199	0.01951	0.06534	0.00118	0.01953	0.00043	483.7	99.98	419.8	13.1	408	7.16	390.9	8.56	102.892
WZ02-25		14.2307	160.29	150.87	1.06244	0.05868	0.00232	0.53283	0.0158	0.06583	0.00113	0.02093	0.00034	555.3	83.85	433.7	10.47	411	6.85	418.7	6.81	105.523
WZ02-26		104.276	51.05	1483.59	0.0344098	0.05752	0.00185	0.51497	0.00994	0.06491	0.00105	0.02593	0.00067	511.1	69.36	421.8	6.66	405.4	6.36	517.4	13.28	104.045
WZ02-28		8.56395	73.98	100.29	0.737661	0.05566	0.00248	0.50149	0.01804	0.06533	0.00117	0.01989	0.00041	438.4	95.98	412.7	12.2	407.9	7.07	398.1	8.07	101.177
WZ02-29		7.98766	63.95	95.73	0.668025	0.05529	0.00336	0.4955	0.02682	0.06498	0.00135	0.0198	0.00059	423.6	130.21	408.6	18.21	405.8	8.14	396.3	11.73	100.69
WZ02-30		7.20936	61.31	83.09	0.737875	0.05538	0.0026	0.49441	0.01916	0.06473	0.00118	0.01984	0.00043	427.3	101.14	407.9	13.02	404.3	7.15	397	8.49	100.89
WZ02-32		40.494	128.28	586.28	0.218803	0.055	0.00187	0.48966	0.01099	0.06455	0.00107	0.02019	0.00038	412.2	73.76	404.7	7.49	403.2	6.46	404	7.58	100.372
WZ02-33		16.6831	131.37	186.79	0.703303	0.05585	0.00219	0.49696	0.01461	0.06451	0.00111	0.01956	0.00035	446.1	84.67	409.6	9.91	403	6.73	391.6	7.01	101.638
WZ02-34		8.87512	85.77	111.78	0.767311	0.05526	0.00306	0.4948	0.02397	0.06492	0.00128	0.02041	0.00053	422.4	118.67	408.2	16.28	405.5	7.76	408.3	10.46	100.666
WZ02-35		9.88465	87.37	110.3	0.792112	0.05436	0.00249	0.48522	0.01827	0.06471	0.00117	0.0205	0.00042	386.1	99.28	401.6	12.49	404.2	7.09	410.2	8.25	99.3568
WZ02-36		12.9777	154.95	144.13	1.07507	0.05506	0.00233	0.49315	0.01647	0.06493	0.00115	0.01965	0.00034	414.7	91.55	407.1	11.2	405.6	6.95	393.3	6.79	100.37
WZ02-37		118.285	29.33	1763.66	0.0166302	0.05538	0.00143	0.50745	0.00718	0.06644	0.00089	0.02196	0.00035	427.5	56.24	416.7	4.84	414.7	5.38	439	6.97	100.482
WZ02-40		10.23	99.47	120.61	0.824724	0.0564	0.00161	0.51818	0.00968	0.06661	0.00092	0.02159	0.00027	467.6	62.5	423.9	6.47	415.7	5.54	431.8	5.27	101.973
WZ02-44		40.118	215.1	539.2	0.398924	0.05645	0.00147	0.51464	0.00768	0.0661	0.00089	0.01956	0.00023	469.5	57.21	421.6	5.15	412.6	5.4	391.5	4.57	102.181
WZ02-45		11.2717	117.64	130.64	0.90049	0.05479	0.00351	0.50092	0.02886	0.06632	0.00141	0.01962	0.00054	403.5	136.62	413.9	8.53	412.3	19.52	392.8	10.62	100.388
WZ02-47		12.3668	134.79	141.9	0.949894	0.056	0.00158	0.51405	0.00944	0.06656	0.00092	0.02114	0.00026	452.1	61.51	421.2	6.33	415.4	5.54	422.8	5.1	101.396
WZ02-48		5.16664	39.22	65.93	0.594873	0.05768	0.00196	0.51882	0.01359	0.06522	0.00095	0.02105	0.00035	517.4	73.33	424.4	9.09	407.3	5.76	421	6.86	104.198
WZ02-50	core	76.048	84.72	650.04	0.13033	0.06219	0.00223	0.93878	0.02333	0.10945	0.00184	0.03692	0.00103	680.5	74.72	669.5	10.68	672.2	12.22	732.7	20.15	99.5983
Sample WZ03
WZ03-01		1.22127	1.22	1.21873	1.21393	0.10785	0.00945	4.63309	0.38972	0.31161	0.01177	0.32819	0.0407	1763.4	152.03	1755.2	70.25	1748.6	57.87	5736.5	619.4	100.377
WZ03-02		4.95413	28.65	62.29	0.459945	0.0563	0.00315	0.51002	0.02495	0.06571	0.00128	0.0208	0.00064	463.4	120.03	418.5	16.78	410.3	7.71	416.1	12.58	101.999
WZ03-03		11.94	106.38	142.72	0.745376	0.055	0.00431	0.48347	0.03511	0.06376	0.00153	0.01954	0.0007	412.2	166.14	400.4	24.03	398.5	9.29	391.1	13.89	100.477
WZ03-04		21.8912	128.32	279.09	0.45978	0.05611	0.00228	0.49806	0.01551	0.06438	0.00113	0.01988	0.00043	456.5	88.19	410.4	10.51	402.2	6.82	398	8.56	102.039
WZ03-05		5.13829	36.1	63.31	0.57021	0.05527	0.00336	0.495	0.02681	0.06497	0.00132	0.02096	0.00064	422.8	130.27	408.3	18.21	405.8	8	419.3	12.74	100.616
WZ03-06		20.9531	74.72	173.48	0.430712	0.06185	0.0039	0.65336	0.037	0.07662	0.00166	0.0224	0.00074	668.9	129.6	510.5	22.73	475.9	9.92	447.8	14.59	107.27
WZ03-07		8.3697	58.77	92.9	0.632616	0.05517	0.00266	0.49976	0.02004	0.0657	0.00122	0.0213	0.00044	418.9	104.05	411.5	13.57	410.2	7.38	426.1	8.66	100.317
WZ03-08		4.62306	26.72	59.86	0.446375	0.05496	0.00353	0.47733	0.02759	0.063	0.00134	0.01906	0.00056	410.4	137.56	396.2	18.96	393.8	8.12	381.7	11.14	100.609
WZ03-09		17.0776	158	200.66	0.787402	0.05475	0.00217	0.48763	0.01454	0.0646	0.00111	0.01981	0.00035	401.9	85.85	403.3	9.93	403.6	6.75	396.5	6.93	99.9257
WZ03-10		9.31898	69.87	110.21	0.633972	0.05472	0.00544	0.48297	0.0455	0.06401	0.00182	0.02111	0.00104	400.1	209.26	400.1	31.16	400	11.01	422.3	20.55	100.025
WZ03-11		14.1437	60.27	137.43	0.438551	0.06253	0.00244	0.75051	0.02179	0.08706	0.00151	0.02216	0.0005	692.2	81.17	568.5	12.64	538.1	8.95	443	9.81	105.65
WZ03-12		11.6998	129.58	132.53	0.977741	0.05594	0.00259	0.49815	0.01891	0.06458	0.00117	0.01968	0.0004	449.7	100.09	410.4	12.82	403.4	7.1	393.9	7.98	101.735
WZ03-13		3.1638	14.68	33.87	0.433422	0.06032	0.00338	0.58683	0.0288	0.07056	0.00139	0.02416	0.00065	615	116.76	468.8	18.43	439.5	8.35	482.5	12.74	106.667
WZ03-14		7.20479	58.88	86.45	0.681087	0.05721	0.00251	0.49745	0.01738	0.06306	0.00112	0.0201	0.00039	499.1	94.45	410	11.79	394.2	6.78	402.3	7.8	104.008
WZ03-15		8.57694	67.88	98.22	0.691102	0.05784	0.00271	0.53195	0.02052	0.0667	0.00122	0.02139	0.00048	523.5	99.86	433.1	13.6	416.2	7.35	427.7	9.45	104.061
WZ03-16		11.4886	100.84	132.98	0.75831	0.05557	0.00281	0.49996	0.0214	0.06525	0.00123	0.0205	0.00047	435.1	109.11	411.7	14.48	407.4	7.46	410.1	9.32	101.055
WZ03-17		7.28702	42.83	89.78	0.477055	0.05889	0.00339	0.56539	0.02858	0.06963	0.0014	0.02332	0.00074	563.1	120.59	455	18.54	433.9	8.45	465.9	14.71	104.863
WZ03-18		7.71708	57.15	93.95	0.608302	0.05546	0.00274	0.49694	0.02064	0.06499	0.0012	0.02054	0.00053	430.3	106.24	409.6	14	405.9	7.28	411	10.42	100.912
WZ03-19		4.28966	29.77	58.9	0.505433	0.05432	0.0032	0.47026	0.02451	0.06278	0.00127	0.01946	0.00054	384.4	127.04	391.4	16.93	392.5	7.69	389.6	10.78	99.7197
WZ03-20		2.94649	13.92	34.11	0.408091	0.05724	0.00448	0.55288	0.04013	0.07005	0.00165	0.02455	0.00121	500.3	163.96	446.9	26.24	436.4	9.96	490.2	23.82	102.406
WZ03-21		15.2821	143.07	175.02	0.817449	0.05596	0.00238	0.49695	0.01651	0.0644	0.00113	0.02144	0.00039	450.6	91.29	409.6	11.2	402.3	6.85	428.8	7.78	101.815
WZ03-22		5.71003	37.85	66.92	0.565601	0.0584	0.00416	0.54947	0.03586	0.06823	0.00153	0.02092	0.00078	545	148.46	444.6	23.5	425.5	9.21	418.6	15.52	104.489
WZ03-23		20.2868	190.55	240.42	0.792571	0.05962	0.00371	0.58506	0.03257	0.07117	0.0015	0.02341	0.00085	589.8	129.6	467.7	20.86	443.2	9.05	467.7	16.76	105.528
WZ03-24		14.2451	118.45	158.11	0.749162	0.0577	0.0028	0.54539	0.02208	0.06855	0.00127	0.02143	0.00048	518	103.49	442	14.5	427.4	7.69	428.6	9.59	103.416
WZ03-25		16.7098	138.8	192.51	0.721002	0.05531	0.0026	0.49316	0.01909	0.06466	0.00118	0.02047	0.00045	424.4	101.62	407.1	12.98	403.9	7.14	409.5	8.95	100.792
WZ03-26		381.595	171.85	2423.2	0.0709186	0.0747	0.00232	1.48444	0.02539	0.14412	0.0023	0.04523	0.00076	1060.4	61.2	924	10.38	867.9	12.98	894.1	14.76	106.464
WZ03-27		26.2601	79.87	209.23	0.381733	0.06626	0.00256	0.935	0.02651	0.10233	0.00177	0.03588	0.00077	814.7	78.77	670.3	13.91	628	10.34	712.5	15.02	106.736
WZ03-28		12.7843	97.31	140.69	0.691663	0.0568	0.0024	0.53944	0.0178	0.06887	0.0012	0.02285	0.00044	483.1	91.47	438.1	11.74	429.3	7.25	456.6	8.74	102.05
WZ03-29		139.77	61.51	578.78	0.106275	0.06976	0.00226	1.32462	0.02679	0.13772	0.00231	0.04834	0.0011	921.2	65.16	856.5	11.7	831.7	13.07	954.1	21.27	102.982
WZ03-30		70.5342	602.09	838.94	0.717679	0.05545	0.0018	0.48764	0.00956	0.06377	0.00103	0.02026	0.00029	430.2	70.71	403.3	6.52	398.5	6.22	405.5	5.7	101.205
WZ03-31		25.4363	245.66	274.71	0.894252	0.05617	0.00254	0.49025	0.01789	0.0633	0.00113	0.02053	0.00041	458.5	97.66	405.1	12.19	395.7	6.88	410.8	8.15	102.376
WZ03-32		5.32455	54.39	59.25	0.917975	0.05557	0.00387	0.4795	0.03053	0.06257	0.00135	0.02081	0.00061	435	148.42	397.7	20.95	391.2	8.18	416.3	12.02	101.662
WZ03-33		26.557	284.8	314.38	0.90591	0.05446	0.00219	0.47146	0.01427	0.06278	0.00107	0.02016	0.00034	390	87.06	392.2	9.85	392.5	6.5	403.4	6.8	99.9236
WZ03-34		94.5207	399.42	1214.38	0.328909	0.05556	0.00177	0.49869	0.00919	0.06509	0.00104	0.02129	0.00031	434.6	69.25	410.8	6.23	406.5	6.29	425.7	6.17	101.058
WZ03-35		6.40029	51.13	76.91	0.664803	0.0556	0.00288	0.4957	0.02195	0.06465	0.0012	0.01989	0.00049	436.2	111.81	408.8	14.9	403.8	7.27	398	9.65	101.238
WZ03-36		7.45467	46.09	86.4	0.533449	0.0604	0.00356	0.56511	0.02941	0.06784	0.00138	0.02344	0.00074	618.1	122.44	454.8	19.08	423.1	8.33	468.3	14.66	107.492
WZ03-37		11.763	99.44	148.12	0.671348	0.05409	0.0021	0.46514	0.01354	0.06237	0.00108	0.01972	0.00034	374.5	84.65	387.8	9.38	390	6.57	394.8	6.79	99.4359
WZ03-38		19.6671	179.19	238.8	0.750377	0.05468	0.00209	0.48058	0.01362	0.06374	0.0011	0.01973	0.00035	399.1	82.94	398.5	9.34	398.4	6.67	394.9	7.04	100.025
WZ03-39		9.93306	80.49	122.53	0.6569	0.06784	0.00235	1.00546	0.02341	0.10749	0.00183	0.03187	0.00055	863.6	70.13	706.6	11.85	658.2	10.66	634.2	10.77	107.353
WZ03-40		56.5426	239.62	423.11	0.56633	0.05734	0.00325	0.49182	0.02447	0.0622	0.00125	0.02089	0.00066	504.2	120.44	406.2	16.66	389	7.6	417.8	13.11	104.422
WZ03-41		132.183	43.34	843.98	0.0513519	0.05413	0.00249	0.48181	0.01824	0.06456	0.00117	0.01961	0.00044	376.1	99.72	399.3	12.5	403.3	7.09	392.5	8.74	99.0082
WZ03-42		10.4	71.97	123.9	0.580872	0.16155	0.00493	9.41347	0.16	0.42259	0.00697	0.09487	0.00284	2472	50.57	2379.1	15.6	2272.2	31.59	1831.9	52.5	104.705
WZ03-43		22.9502	208.98	266.1	0.785344	0.0543	0.00195	0.4786	0.01202	0.06392	0.00109	0.01872	0.00038	383.4	78	397.1	8.26	399.4	6.59	374.9	7.47	99.4241
WZ03-44		5.03822	28.1	56.87	0.494109	0.05727	0.00203	0.52708	0.01289	0.06674	0.00113	0.02051	0.00033	501.6	76.55	429.9	8.57	416.5	6.84	410.4	6.59	103.217
WZ03-45		4.70751	25.89	53.08	0.487754	0.05476	0.00175	0.47348	0.00925	0.0627	0.00104	0.01951	0.0003	402.6	69.46	393.6	6.37	392	6.29	390.6	6	100.408
WZ03-46		14.4829	86.66	164.91	0.525499	0.05375	0.00185	0.47394	0.01099	0.06394	0.00108	0.01886	0.00036	360.6	75.8	393.9	7.57	399.6	6.52	377.6	7.17	98.5736
WZ03-47		14.0431	135.28	170.63	0.792827	0.05687	0.00246	0.54564	0.01886	0.06958	0.00125	0.02149	0.00048	485.9	93.32	442.1	12.39	433.6	7.54	429.8	9.44	101.96
WZ03-48		4.93191	32.46	67.84	0.478479	0.05428	0.00212	0.47062	0.01386	0.06288	0.00109	0.01929	0.00034	382.7	84.96	391.6	9.57	393.1	6.63	386.2	6.82	99.6184
WZ03-49		8.24464	67	98.01	0.683604	0.053	0.00204	0.46224	0.01322	0.06326	0.0011	0.01839	0.0004	328.6	84.9	385.8	9.18	395.4	6.65	368.4	7.88	97.5721
WZ03-50		7.33954	52.88	88.1	0.600227	0.05847	0.003	0.53574	0.02359	0.06645	0.00127	0.02055	0.00057	547.4	108.39	435.6	15.6	414.7	7.69	411.2	11.22	105.04
WZ03-51		59.1197	35.89	406	0.088399	0.05413	0.00188	0.48091	0.01133	0.06443	0.00109	0.01979	0.0003	376.4	76.02	398.7	7.77	402.5	6.58	396	6	99.0559
WZ03-52		5.14306	27.88	59.75	0.466611	0.05614	0.00251	0.51238	0.01858	0.0662	0.00121	0.02189	0.00047	457.4	96.42	420.1	12.48	413.2	7.3	437.8	9.25	101.67
WZ03-53		6.81439	44.39	86.71	0.511936	0.06835	0.00211	1.21254	0.02158	0.12867	0.00212	0.03405	0.00091	879.1	62.65	806.4	9.9	780.2	12.09	676.8	17.72	103.358
WZ03-54		13.3088	91.65	162.67	0.563411	0.05487	0.00234	0.49307	0.01674	0.06517	0.00117	0.01951	0.00051	407	92.32	407	11.38	407	7.09	390.5	10.09	100
WZ03-55		228.655	10.6	482.88	0.0219516	0.05339	0.00219	0.47151	0.01507	0.06405	0.00113	0.01935	0.00037	345.4	90.02	392.2	10.4	400.2	6.82	387.3	7.27	98.001
WZ03-56		23.1787	186.74	280.06	0.666786	0.06784	0.00217	1.1074	0.02178	0.11839	0.00197	0.0392	0.00093	863.6	65.05	756.9	10.5	721.3	11.36	777.1	18	104.936
WZ03-57	core	5.39977	33.61	72.21	0.465448	0.07649	0.00264	1.86955	0.04379	0.17727	0.00307	0.05555	0.00103	1107.9	67.43	1070.4	15.5	1052	16.81	1092.7	19.66	101.749
WZ03-58		16.7289	172.98	215.23	0.803698	0.05524	0.00207	0.4793	0.01314	0.06293	0.00108	0.02042	0.00034	421.8	81.25	397.6	9.02	393.4	6.58	408.5	6.79	101.068
WZ03-59		5.32415	35.24	66.99	0.526049	0.06798	0.00233	1.15835	0.02665	0.12358	0.00211	0.04067	0.00104	867.9	69.39	781.2	12.54	751.2	12.1	805.7	20.23	103.994
WZ03-60		5.35684	34.41	68.48	0.502482	0.05477	0.00182	0.48436	0.01041	0.06414	0.00107	0.01942	0.00036	402.7	71.98	401.1	7.12	400.8	6.49	388.8	7.2	100.075
WZ03-61		15.6377	58.48	187.44	0.311993	0.05695	0.00268	0.50116	0.01965	0.06382	0.0012	0.02062	0.0008	489.1	101.34	412.5	13.29	398.8	7.25	412.6	15.83	103.435
WZ03-62		12.8409	106.63	159.39	0.668988	0.05428	0.00226	0.46819	0.01527	0.06256	0.00112	0.01858	0.00036	382.4	90.21	389.9	10.56	391.2	6.77	372.1	7.19	99.6677
WZ03-63		5.35333	43.26	67.34	0.642412	0.05479	0.00191	0.48273	0.01161	0.0639	0.00108	0.01967	0.0003	403.8	75.7	399.9	7.95	399.3	6.55	393.7	6	100.15
WZ03-64		13.8862	138.52	175.45	0.789513	0.0553	0.00206	0.49131	0.01336	0.06443	0.00111	0.02029	0.00034	424.4	80.79	405.8	9.1	402.5	6.72	406	6.75	100.82
WZ03-65		70.1096	259.03	904.49	0.286382	0.05487	0.00228	0.4902	0.01606	0.0648	0.00115	0.02027	0.00037	406.7	90.08	405	10.94	404.7	6.98	405.6	7.35	100.074
WZ03-66		8.00943	55.6	98.11	0.566711	0.05662	0.0025	0.52513	0.01878	0.06727	0.00123	0.02155	0.00054	476	95.49	428.6	12.5	419.7	7.43	430.9	10.71	102.121
WZ03-67		6.94776	54.96	80.9	0.679357	0.05308	0.00223	0.4621	0.01531	0.06314	0.00113	0.01789	0.00044	332.1	92.25	385.7	10.63	394.7	6.84	358.4	8.72	97.7198
WZ03-68		4.11377	23.88	53.56	0.445855	0.0556	0.0031	0.48259	0.02363	0.06295	0.00126	0.0203	0.00058	436	119.88	399.8	16.18	393.6	7.66	406.2	11.5	101.575
WZ03-69		8.19157	61.72	100.15	0.616276	0.05444	0.0024	0.4786	0.01706	0.06376	0.00116	0.0198	0.00041	389.4	95.32	397.1	11.72	398.4	7.05	396.3	8.06	99.6737
WZ03-70		10.899	87.73	137.76	0.636832	0.05552	0.00263	0.48095	0.01899	0.06283	0.00118	0.02052	0.00053	432.9	101.84	398.7	13.02	392.8	7.13	410.6	10.45	101.502
WZ03-71		19.0453	142.06	224.08	0.63397	0.05564	0.00265	0.48061	0.01916	0.06265	0.00118	0.01964	0.00051	437.5	102.36	398.5	13.14	391.7	7.15	393.1	10.07	101.736
WZ03-72		27.7343	91.55	364.14	0.251414	0.05458	0.00267	0.48018	0.01988	0.0638	0.0012	0.02024	0.00053	395.1	105.66	398.2	13.64	398.7	7.26	405.1	10.41	99.8746
WZ03-73		16.1266	89.9	189.37	0.474732	0.06284	0.00276	0.71069	0.02529	0.08202	0.00153	0.02242	0.00057	702.9	90.93	545.2	15.01	508.2	9.09	448.2	11.25	107.281
WZ03-74		20.6319	180.75	235.88	0.766279	0.0569	0.00264	0.53309	0.02055	0.06795	0.00126	0.02204	0.00048	487	99.96	433.9	13.61	423.8	7.6	440.7	9.52	102.383
WZ03-75		19.0692	208.45	220.99	0.943255	0.05393	0.00213	0.4797	0.01448	0.06452	0.00113	0.02014	0.00038	367.9	86.4	397.9	9.94	403	6.82	403	7.62	98.7345
WZ03-76		89.3933	437.45	1187.59	0.368351	0.05515	0.00253	0.49639	0.01886	0.06528	0.00119	0.0207	0.0005	418.2	99.27	409.3	12.79	407.6	7.21	414.1	9.95	100.417
WZ03-77		11.686	123.52	138.82	0.889785	0.05527	0.002	0.49273	0.01272	0.06466	0.00111	0.0193	0.00036	422.8	78.38	406.8	8.65	403.9	6.71	386.3	7.08	100.718
WZ03-78		10.0795	73.97	129.26	0.572257	0.05941	0.00418	0.59239	0.03828	0.07231	0.00169	0.02338	0.00095	582.3	145.99	472.4	24.41	450.1	10.13	467.2	18.84	104.954
WZ03-79		50.2546	147.3	190.1	0.774855	0.05647	0.00257	0.5205	0.01954	0.06685	0.00123	0.02121	0.00051	470.2	98.51	425.5	13.05	417.1	7.42	424.2	10.13	102.014
WZ03-80		19.1816	196.41	249.9	0.785954	0.07243	0.00232	1.50706	0.02956	0.1509	0.00252	0.05172	0.00091	998.1	63.63	933.3	11.97	906	14.12	1019.2	17.53	103.013
WZ03-81		8.83701	76.18	111.92	0.680665	0.05361	0.002	0.47825	0.0131	0.0647	0.00111	0.01997	0.00035	354.7	81.88	396.9	9	404.1	6.75	399.7	6.86	98.2183
WZ03-82	rim	8.404	77.04	103.6	0.743629	0.05322	0.00207	0.46261	0.01358	0.06304	0.0011	0.01917	0.00046	338.2	85.46	386.1	9.43	394.1	6.68	383.9	9.16	97.9701
WZ03-83	core	8.77117	41.6	100.21	0.415128	0.07526	0.00242	1.73132	0.03441	0.16685	0.0028	0.05523	0.0009	1075.3	63.2	1020.2	12.79	994.7	15.45	1086.6	17.31	102.564
WZ03-84	rim	8.23991	53.4	104.44	0.511298	0.05522	0.00211	0.49275	0.01411	0.06472	0.00113	0.02013	0.00037	420.9	82.88	406.8	9.6	404.3	6.81	402.7	7.25	100.618
WZ03-85		5.45641	31.53	68.16	0.462588	0.05488	0.00218	0.48398	0.01472	0.06397	0.00113	0.01996	0.00047	407.2	85.78	400.8	10.07	399.7	6.83	399.4	9.31	100.275
WZ03-86		8.52991	47.8	103.62	0.461301	0.05468	0.00303	0.48828	0.02377	0.06477	0.0013	0.01962	0.00055	399.3	119.35	403.7	16.22	404.5	7.84	392.7	10.88	99.8022
WZ03-87		5.88683	35	73.35	0.477164	0.0558	0.00204	0.51788	0.01365	0.06731	0.00116	0.02166	0.00037	444.1	79.21	423.7	9.13	420	6.99	433.1	7.36	100.881
WZ03-88		29.6772	173	382.82	0.45191	0.05525	0.00367	0.49397	0.02994	0.06485	0.00141	0.02026	0.00073	422.1	142.08	407.6	20.35	405	8.55	405.4	14.55	100.642
WZ03-89		42.8034	191.96	563.04	0.340935	0.05635	0.00232	0.50772	0.01646	0.06535	0.00117	0.02019	0.00039	465.3	89.59	416.9	11.09	408.1	7.06	403.9	7.7	102.156
WZ03-90		6.58481	41.92	84.32	0.497154	0.05485	0.00222	0.4913	0.01545	0.06496	0.00115	0.02078	0.00041	406.2	87.49	405.8	10.52	405.7	6.97	415.6	8.09	100.025
WZ03-91		6.26283	38.21	82.77	0.461641	0.05782	0.00259	0.54883	0.02021	0.06884	0.00126	0.02151	0.00053	522.8	95.71	444.2	13.25	429.2	7.61	430.1	10.58	103.495
WZ03-92		5.11964	31.78	63.07	0.503885	0.05786	0.00256	0.56198	0.02026	0.07045	0.0013	0.02282	0.00071	524.1	94.44	452.8	13.17	438.9	7.82	456.1	14.01	103.167
WZ03-93		92.5475	28.55	590.99	0.0483088	0.06739	0.00226	1.0527	0.02319	0.11329	0.00192	0.0359	0.00082	849.9	68.27	730.2	11.47	691.8	11.1	712.9	16.08	105.551
WZ03-94		7.1205	48.22	84.8	0.568632	0.05409	0.00214	0.47472	0.01444	0.06365	0.00112	0.01898	0.00035	374.7	86.11	394.4	9.94	397.8	6.8	380	7.04	99.1453
WZ03-95		29.5213	239.56	342.34	0.699772	0.05264	0.00297	0.4639	0.02313	0.06393	0.00128	0.01987	0.0006	313.1	123.27	387	16.05	399.5	7.76	397.7	11.83	96.8711
WZ03-96		22.2128	243.31	267.92	0.908144	0.055	0.0034	0.48778	0.02717	0.06433	0.00137	0.02119	0.00065	412.2	132.77	403.4	18.54	401.9	8.27	423.7	12.91	100.373
WZ03-97		4.45965	30.85	57.18	0.539524	0.05322	0.00283	0.46588	0.0216	0.06349	0.00123	0.01949	0.00058	338.2	115.92	388.3	14.96	396.8	7.48	390.2	11.42	97.8579
WZ03-98		22.2543	111.49	286.32	0.389389	0.05412	0.00225	0.48293	0.01587	0.06472	0.00116	0.01955	0.00039	376.1	90.23	400.1	10.87	404.3	7.01	391.4	7.69	98.9612
Sample WZ04
WZ04-15N	rim	8.30668	69.96	103.77	0.674183	0.05926	0.00178	0.50477	0.01046	0.06178	0.00084	0.01934	0.00027	576.5	64.05	414.9	7.06	386.4	5.12	387.2	5.28	107.376
WZ04-01		8.5582	91.46	102.25	0.894474	0.05471	0.00299	0.46898	0.0221	0.06216	0.00118	0.01946	0.00044	400.1	118.07	390.5	15.28	388.7	7.14	389.6	8.78	100.463
WZ04-34		15.9986	134.68	201.94	0.666931	0.05433	0.00278	0.46741	0.02029	0.06238	0.00117	0.02024	0.00048	384.6	110.59	389.4	14.04	390.1	7.11	405.1	9.43	99.8206
WZ04-07		7.70926	80.67	91.34	0.883184	0.05629	0.00296	0.48475	0.02175	0.06245	0.00116	0.01993	0.00045	463.1	113.17	401.3	14.88	390.5	7.04	398.8	8.92	102.766
WZ04-13	rim	7.3217	49.89	95.31	0.52345	0.05668	0.00275	0.48978	0.01974	0.06266	0.00113	0.01918	0.0005	478.4	104.56	404.8	13.46	391.8	6.88	383.9	9.88	103.318
WZ04-05	rim	7.48846	60.76	95.82	0.634106	0.05657	0.00382	0.48919	0.02991	0.06271	0.00133	0.01938	0.00065	474.1	143.37	404.4	20.39	392.1	8.09	388	12.9	103.137
WZ04-32	rim	29.4232	173.99	390.62	0.44542	0.05704	0.0021	0.49358	0.01278	0.06274	0.00105	0.01941	0.00036	492.5	79.89	407.3	8.69	392.3	6.35	388.5	7.11	103.824
WZ04-22	rim	22.1649	231.21	299.61	0.771703	0.05459	0.00205	0.47259	0.01266	0.06278	0.00104	0.01968	0.00032	395.5	81.44	393	8.73	392.5	6.32	394	6.3	100.127
WZ04-15		10.4503	68.93	134.3	0.513254	0.05893	0.00257	0.51121	0.01759	0.0629	0.0011	0.02076	0.00046	564.6	92.21	419.3	11.82	393.3	6.64	415.2	9.12	106.611
WZ04-02		13.6063	108.75	168.66	0.644788	0.05913	0.00234	0.51334	0.01508	0.06296	0.00105	0.02056	0.00038	571.8	84.01	420.7	10.12	393.6	6.38	411.3	7.51	106.885
WZ04-08	rim	10.6669	80.31	134.84	0.595595	0.05718	0.00247	0.49677	0.01689	0.063	0.00108	0.01991	0.00042	498.1	93.13	409.5	11.46	393.8	6.57	398.5	8.26	103.987
WZ04-24N		17.0859	167.67	202.92	0.826286	0.0587	0.00167	0.51034	0.00938	0.06305	0.00085	0.01958	0.00024	555.9	60.81	418.7	6.3	394.1	5.16	392	4.83	106.242
WZ04-26N		11.4591	119.11	135.35	0.880015	0.05496	0.00157	0.47853	0.00895	0.06314	0.00085	0.01932	0.00024	410.7	62.09	397.1	6.15	394.7	5.18	386.7	4.73	100.608
WZ04-17N	rim	19.35	146.91	246.38	0.596274	0.05412	0.00145	0.47163	0.00752	0.0632	0.00084	0.01763	0.00021	375.8	59.19	392.3	5.19	395.1	5.07	353.3	4.2	99.2913
WZ04-25N		9.16501	60.62	115.75	0.523715	0.05948	0.00168	0.52316	0.00954	0.06379	0.00086	0.02045	0.00027	584.6	60.3	427.3	6.36	398.6	5.22	409.1	5.31	107.2
WZ04-18		7.66935	61.45	93.25	0.658981	0.0576	0.00287	0.50805	0.02126	0.06396	0.00118	0.02116	0.0005	514.4	106.25	417.1	14.31	399.6	7.13	423.3	9.92	104.379
WZ04-36		12.9566	75.71	166.35	0.455125	0.05739	0.00247	0.50611	0.01717	0.06395	0.00113	0.02145	0.00047	506	92.51	415.8	11.57	399.6	6.82	429	9.27	104.054
WZ04-11N		7.09004	44.36	88.62	0.500564	0.05718	0.0019	0.50449	0.01263	0.06399	0.0009	0.02109	0.00035	497.9	72.26	414.7	8.52	399.8	5.45	421.8	6.98	103.727
WZ04-27		5.25278	47.68	62.03	0.76866	0.05846	0.00337	0.51661	0.02617	0.06408	0.00125	0.02106	0.00054	547.1	121.13	422.9	17.52	400.4	7.55	421.3	10.64	105.619
WZ04-28		25.219	52.55	349.65	0.150293	0.05825	0.00231	0.5151	0.01523	0.06413	0.0011	0.02674	0.00075	538.4	85.13	421.9	10.21	400.7	6.63	533.4	14.74	105.291
WZ04-07N		89.0885	90.39	1257.38	0.0718876	0.05561	0.00142	0.49193	0.00668	0.06416	0.00083	0.02056	0.00026	436.4	55.44	406.2	4.55	400.9	5.04	411.3	5.08	101.322
WZ04-06		13.5788	111.53	162.61	0.685874	0.05852	0.00235	0.5179	0.01559	0.06418	0.00108	0.02158	0.00039	549.4	85.41	423.7	10.43	401	6.52	431.6	7.76	105.661
WZ04-26		6.58052	60.29	76.16	0.791623	0.0616	0.00339	0.54555	0.026	0.06422	0.00125	0.02091	0.00053	660.3	113.74	442.1	17.08	401.2	7.59	418.2	10.49	110.194
WZ04-24		23.1082	192.68	279.59	0.689152	0.05648	0.00208	0.50076	0.01286	0.0643	0.00106	0.02099	0.00035	470.3	80.11	412.2	8.7	401.7	6.44	419.9	6.87	102.614
WZ04-03	rim	13.6312	83.94	167.27	0.501823	0.05685	0.00224	0.50533	0.01472	0.06447	0.00107	0.02127	0.00042	484.9	85.45	415.3	9.93	402.7	6.49	425.4	8.25	103.129
WZ04-30		8.14891	58.88	100.17	0.587801	0.05641	0.00259	0.5021	0.01871	0.06454	0.00115	0.02153	0.00048	467.9	99.24	413.1	12.65	403.2	6.98	430.6	9.5	102.455
WZ04-29		8.83828	53.29	108.97	0.489034	0.05629	0.00266	0.50148	0.01954	0.0646	0.00118	0.02133	0.00053	463	102.37	412.7	13.21	403.5	7.12	426.6	10.48	102.28
WZ04-09N		23.5521	196.93	238.81	0.82463	0.05603	0.00333	0.54756	0.0288	0.07087	0.00144	0.02016	0.00053	453.4	127.12	443.4	18.89	441.4	8.68	403.5	10.42	100.453
WZ04-14		5.11111	43.28	56.52	0.765747	0.05629	0.00339	0.56822	0.03043	0.07322	0.00147	0.02329	0.00064	462.9	128.86	456.9	19.71	455.5	8.81	465.4	12.55	100.307
WZ04-13N		31.8419	126.72	350.83	0.361201	0.05754	0.0015	0.59828	0.0087	0.07541	0.00099	0.02563	0.0003	512	56.53	476.1	5.53	468.6	5.92	511.5	5.91	101.601
WZ04-12		5.03812	39.51	50.57	0.781293	0.05686	0.00372	0.60659	0.03589	0.07736	0.0016	0.02178	0.00067	485.5	138.96	481.4	22.68	480.4	9.59	435.4	13.22	100.208
WZ04-31		14.5851	67.11	152.91	0.438886	0.05822	0.00348	0.63559	0.03372	0.07918	0.00164	0.02145	0.00069	537.4	126.34	499.6	20.93	491.2	9.8	428.9	13.67	101.71
WZ04-11		123.157	67.23	1197.06	0.0561626	0.05896	0.00197	0.7119	0.01508	0.08757	0.00142	0.03052	0.00084	565.6	71.32	545.9	8.95	541.2	8.41	607.6	16.52	100.868
WZ04-02N		8.88636	126.48	56.05	2.25656	0.05901	0.00173	0.71578	0.01409	0.08797	0.00118	0.02685	0.00031	567.4	62.54	548.2	8.34	543.5	7	535.6	6.13	100.865
WZ04-16N	core	65.7214	251.45	527.39	0.476782	0.06533	0.00269	0.93279	0.02951	0.10354	0.00182	0.03118	0.00074	785.1	84.23	669.1	15.5	635.1	10.61	620.5	14.48	105.353
WZ04-18N		18.5104	39.36	150.97	0.260714	0.06393	0.00332	0.91873	0.04071	0.10422	0.00205	0.04133	0.00149	739.3	106.15	661.7	21.54	639.1	11.98	818.5	28.99	103.536
WZ04-21	core	28.0299	61.58	208.49	0.295362	0.06457	0.00253	1.04773	0.03052	0.11769	0.00205	0.04026	0.001	760.3	80.52	727.8	15.13	717.2	11.8	797.7	19.35	101.478
WZ04-08N	core	125.403	26.01	803.39	0.0323753	0.06761	0.0029	1.1557	0.03904	0.12396	0.00225	0.05599	0.00393	856.7	86.62	779.9	18.39	753.3	12.88	1101.1	75.28	103.531
WZ04-05N	core	63.644	482.12	289.53	1.66518	0.06711	0.00309	1.21686	0.04584	0.13149	0.00248	0.04297	0.0008	841.3	93.12	808.3	21	796.4	14.11	850.3	15.56	101.494
WZ04-01N	core	82.8651	439.19	485.88	0.903906	0.07007	0.00364	1.28079	0.05685	0.13256	0.0027	0.0433	0.00105	930.4	103.07	837.2	25.31	802.5	15.39	856.8	20.33	104.324
WZ04-20N	core	56.4632	107.48	347.89	0.308948	0.07029	0.00282	1.34234	0.04083	0.13849	0.00245	0.03501	0.00105	936.8	80.3	864.2	17.7	836.1	13.86	695.5	20.49	103.361
WZ04-14N	core	120.133	225.79	467.59	0.48288	0.08535	0.00381	2.64999	0.09594	0.22517	0.0045	0.06224	0.00201	1323.4	84.08	1314.6	26.69	1309.1	23.66	1220.3	38.23	100.42
Note: Pb* is radiogenic lead
